# Supplementary material
Source: PubMed Central journal article supplement (PMC5290120)

Figure S1

**A**

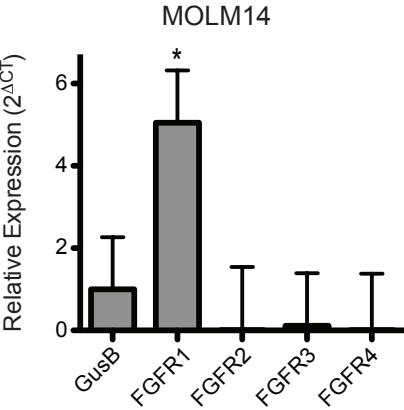

**B**

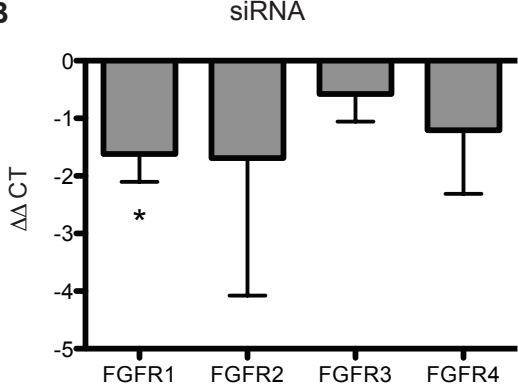

Figure S2

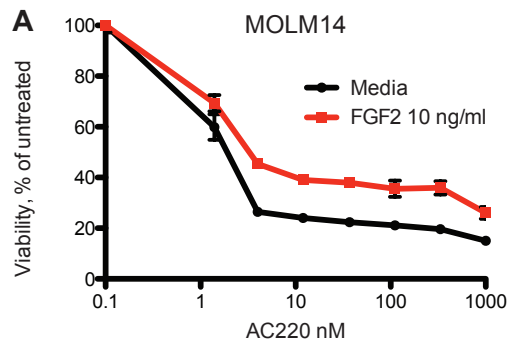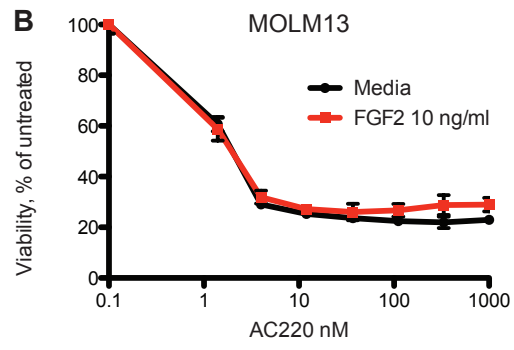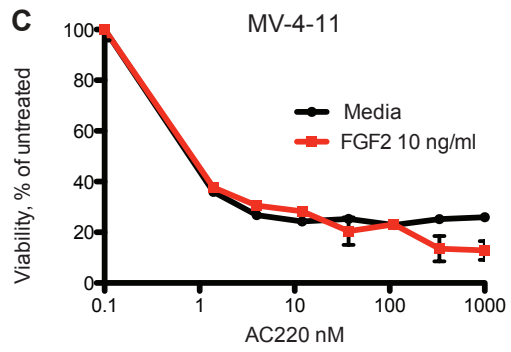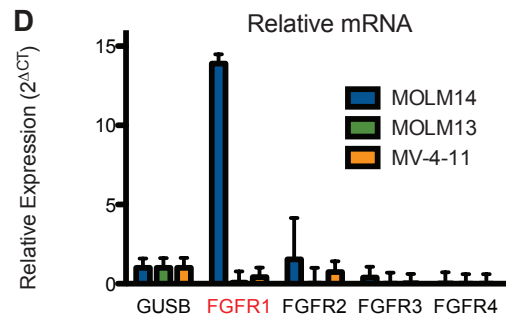

**E** Relative FGFR expression in primary AML (N=79)

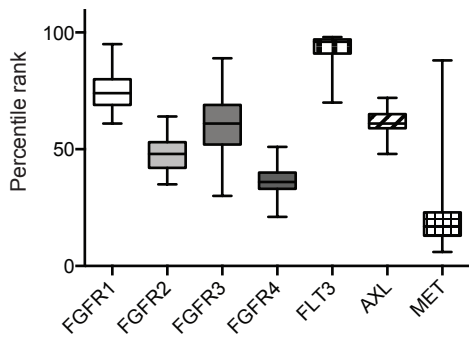

Figure S3

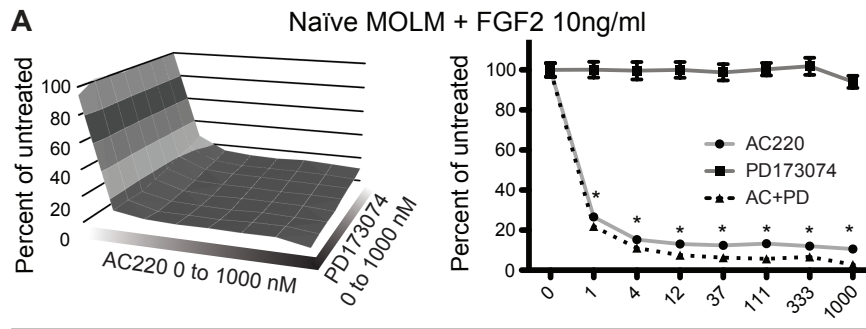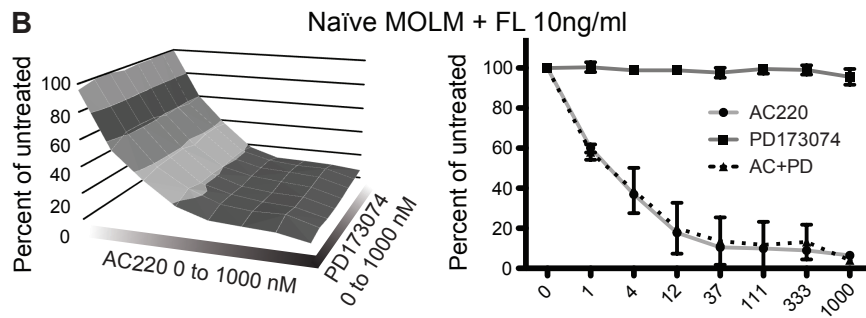

Figure S4

**A**

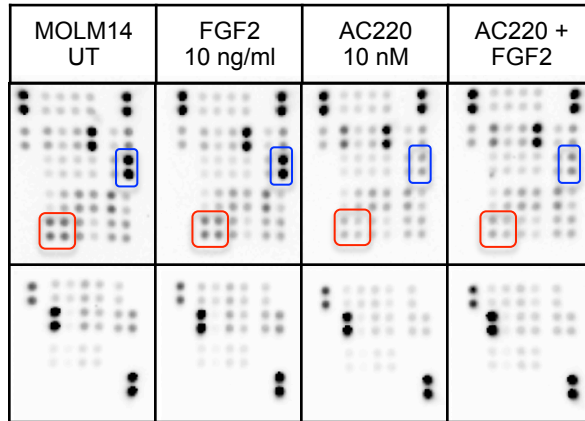

**B**

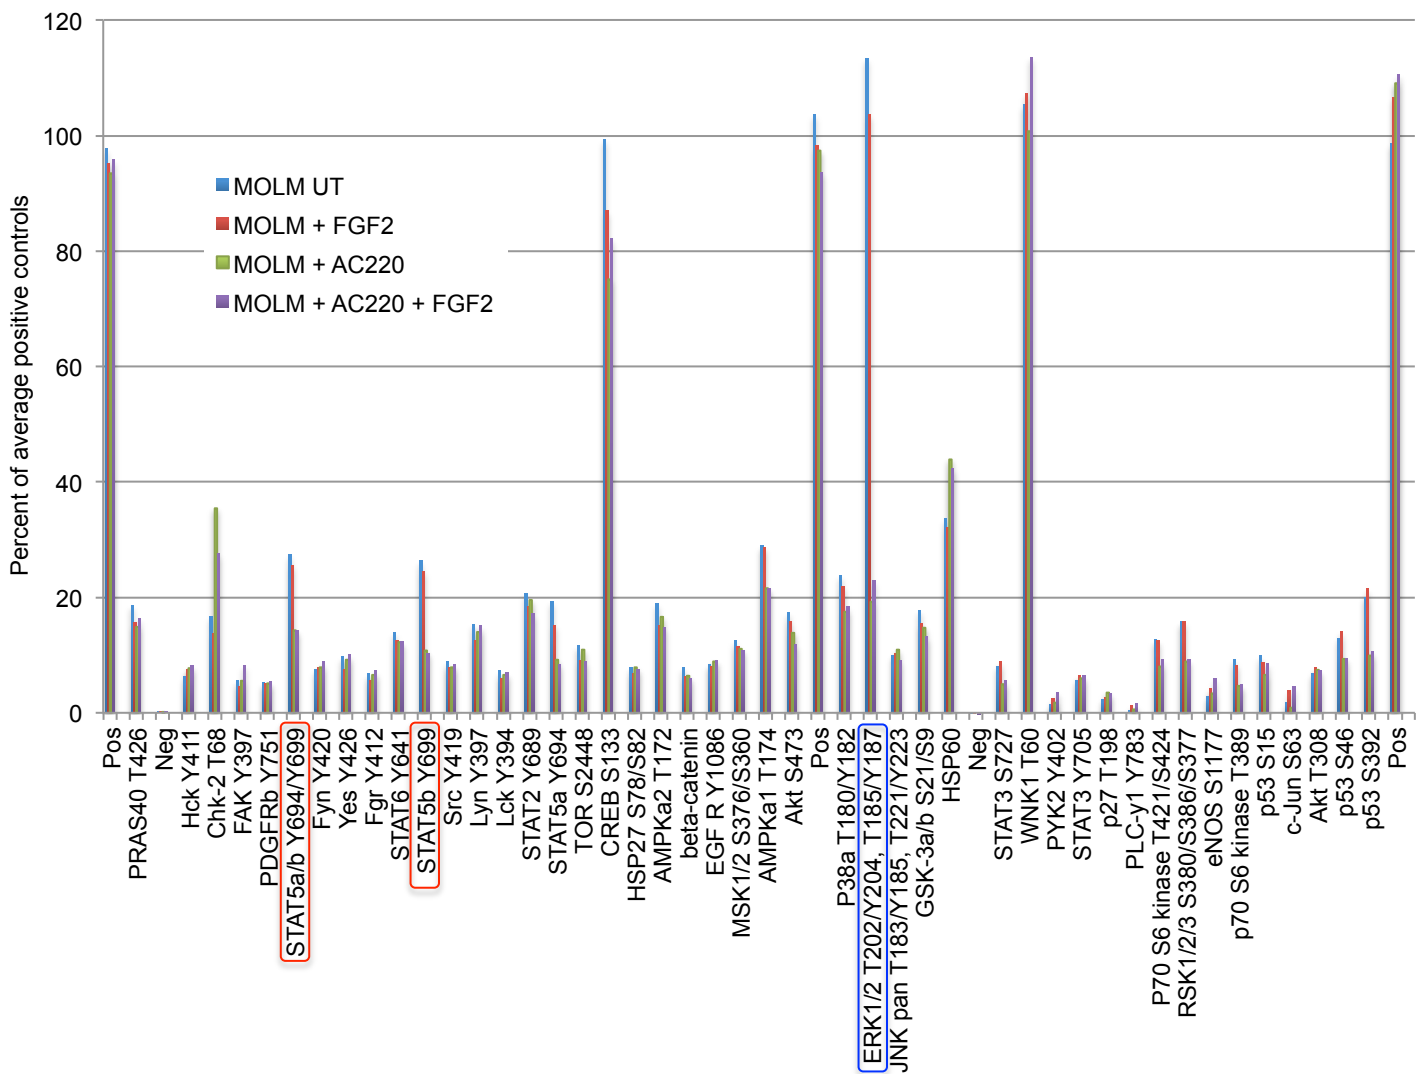



Figure S5

**A**

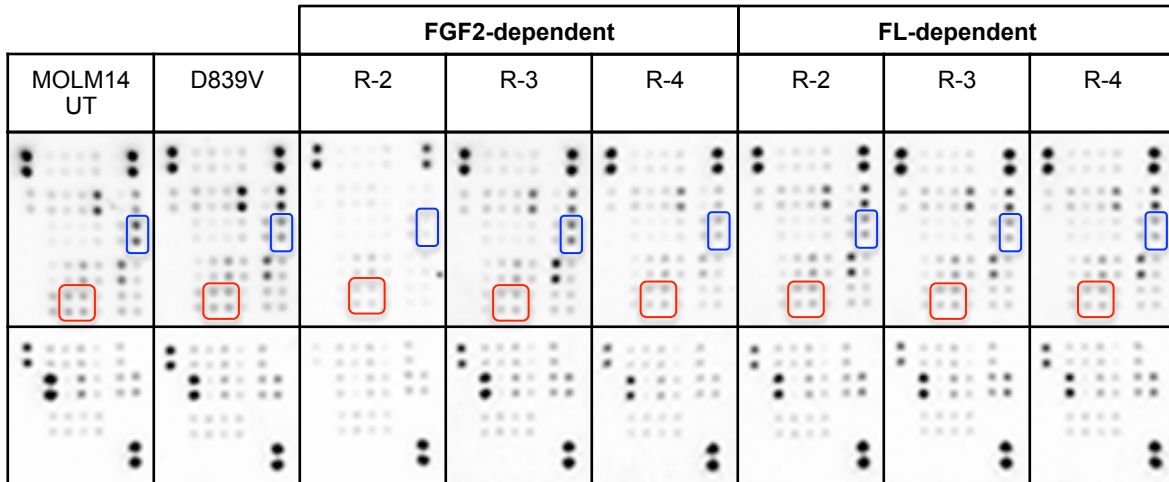

**B**

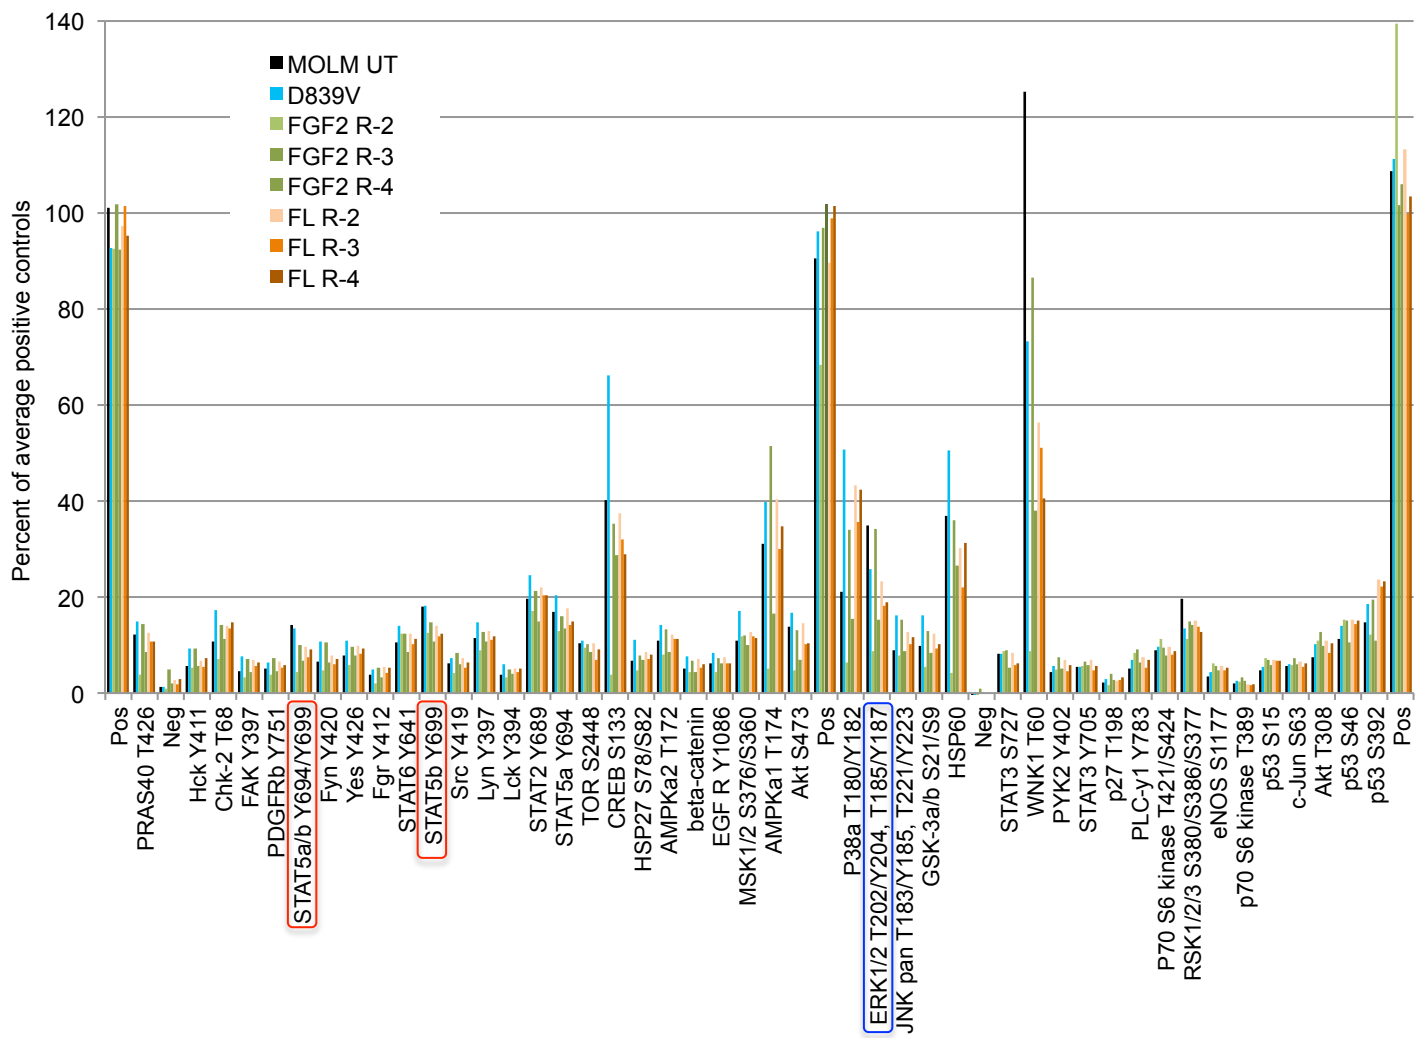

Figure S6

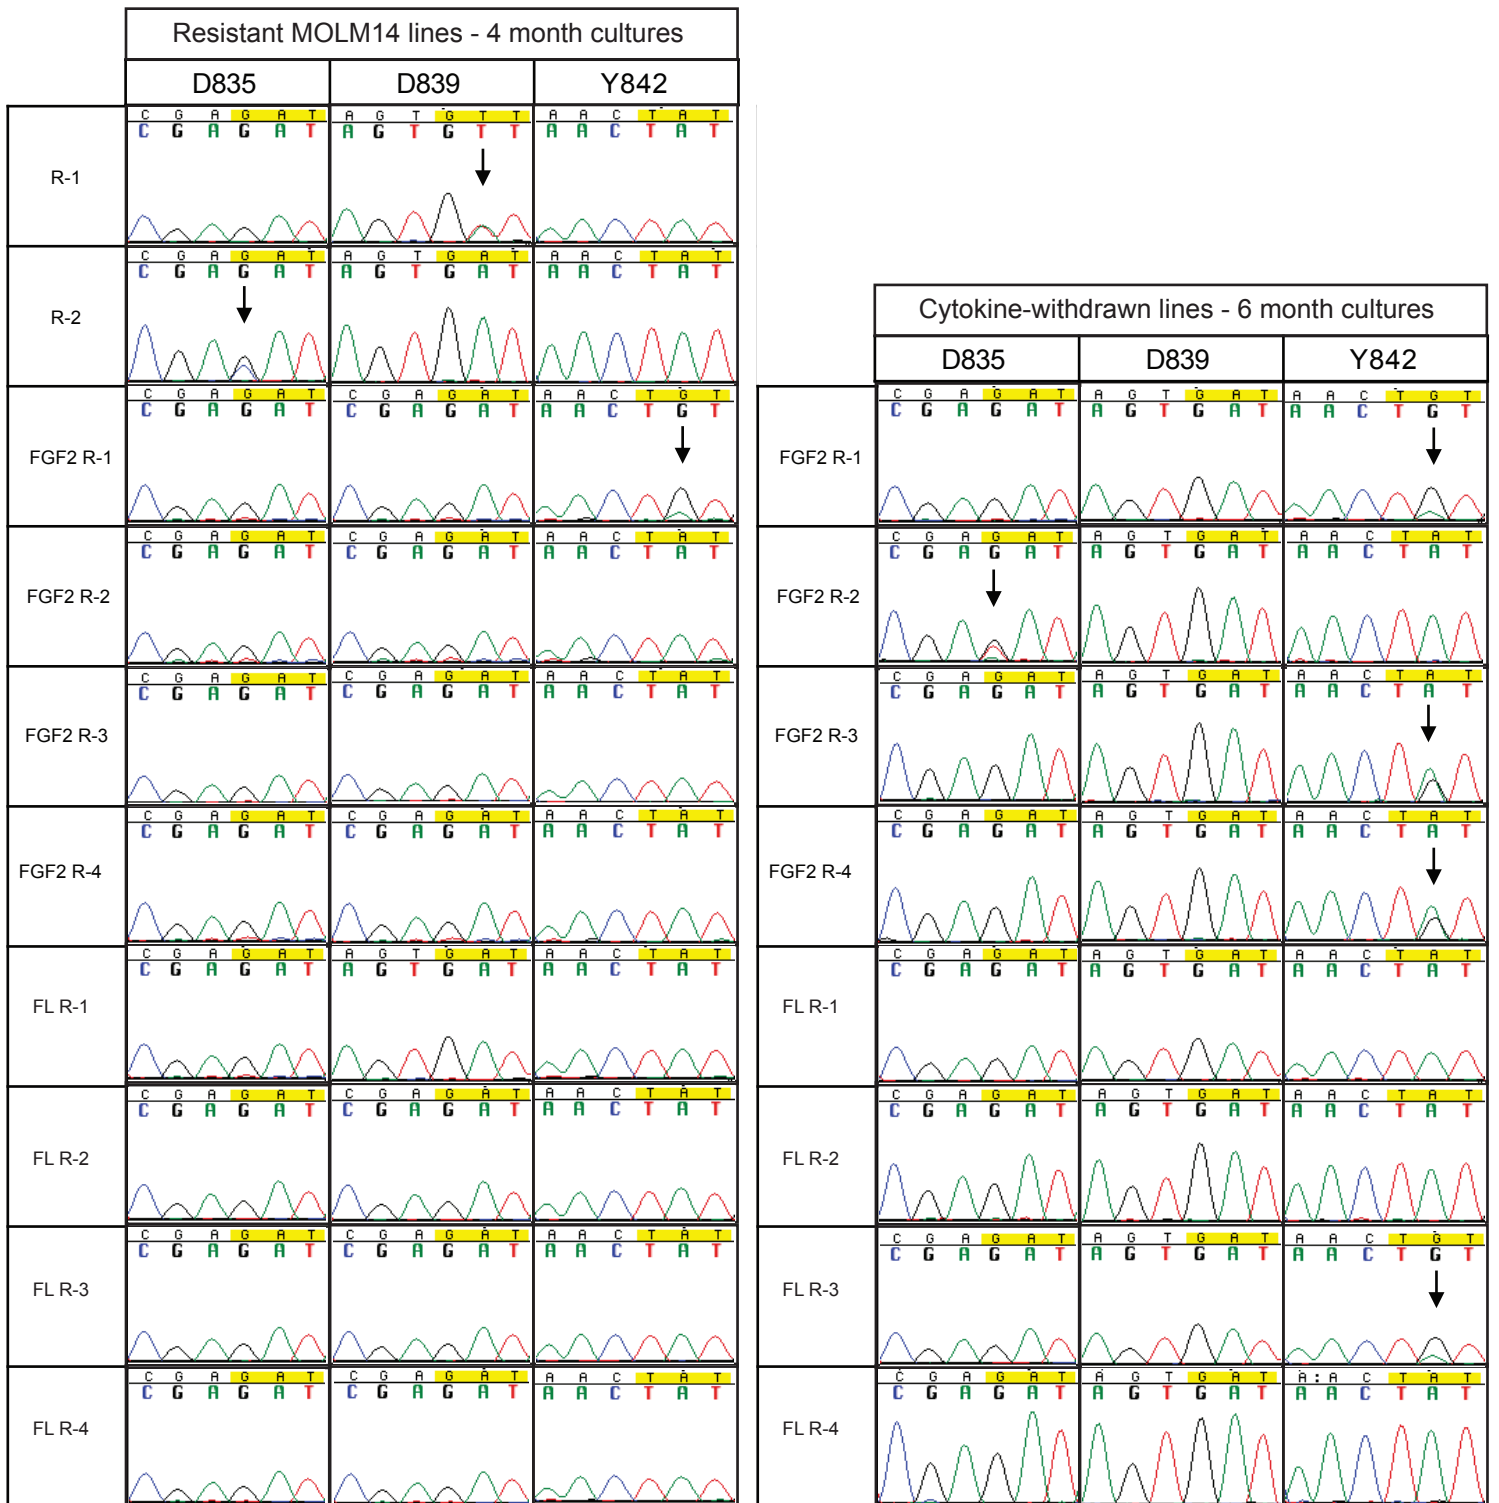

**Figure S7**

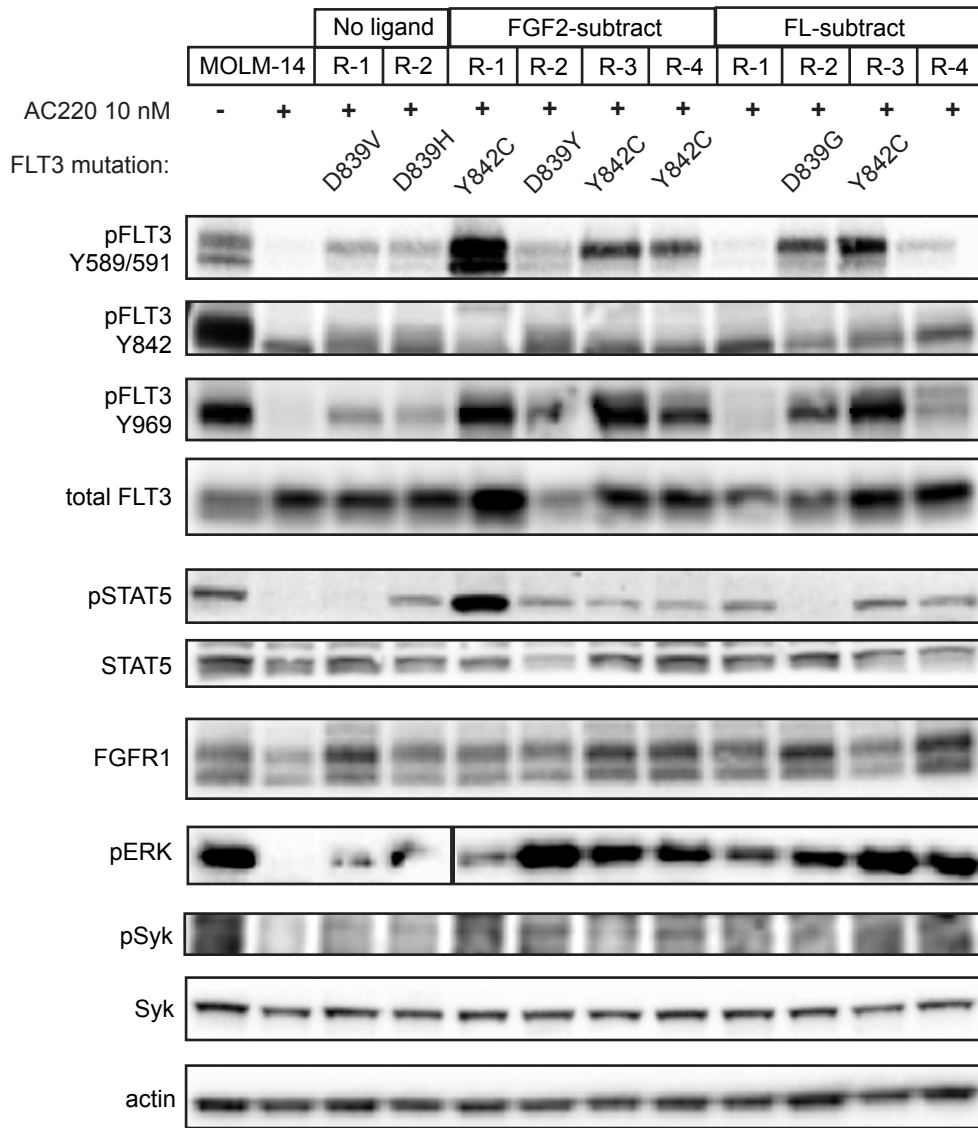

Figure S8

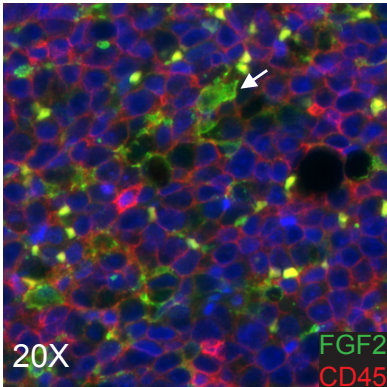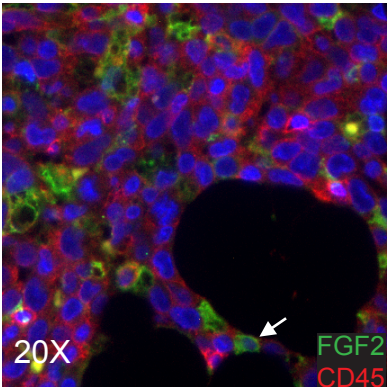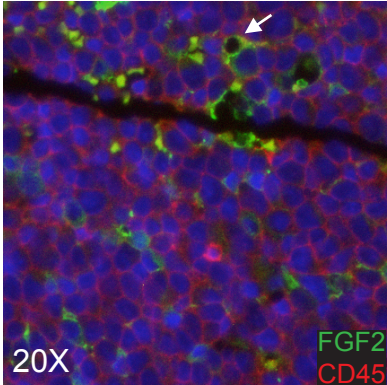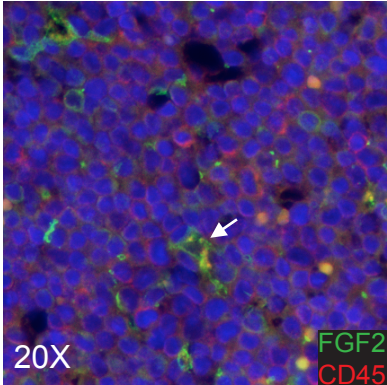

**Figure S9**

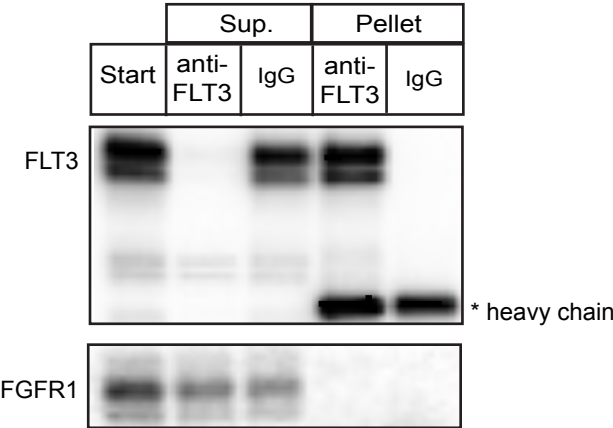

**Figure S10**

**A**

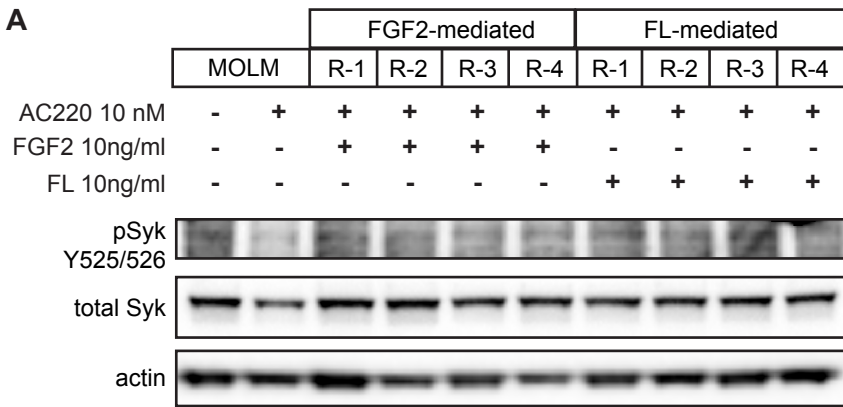

Supplement: NIHMS827038-supplement-4.pdf [file NIHMS827038-supplement-4.pdf]
